# Supplementary material for: The effect of a pharmacist consultation on pregnant women’s quality of life with a special focus on nausea and vomiting: an intervention study
Source: Springer Nature journal article supplement (doi:10.1186/s12884-020-03472-z), 2020-12-01

**Women who gave consent to participate in the study**

N = 369

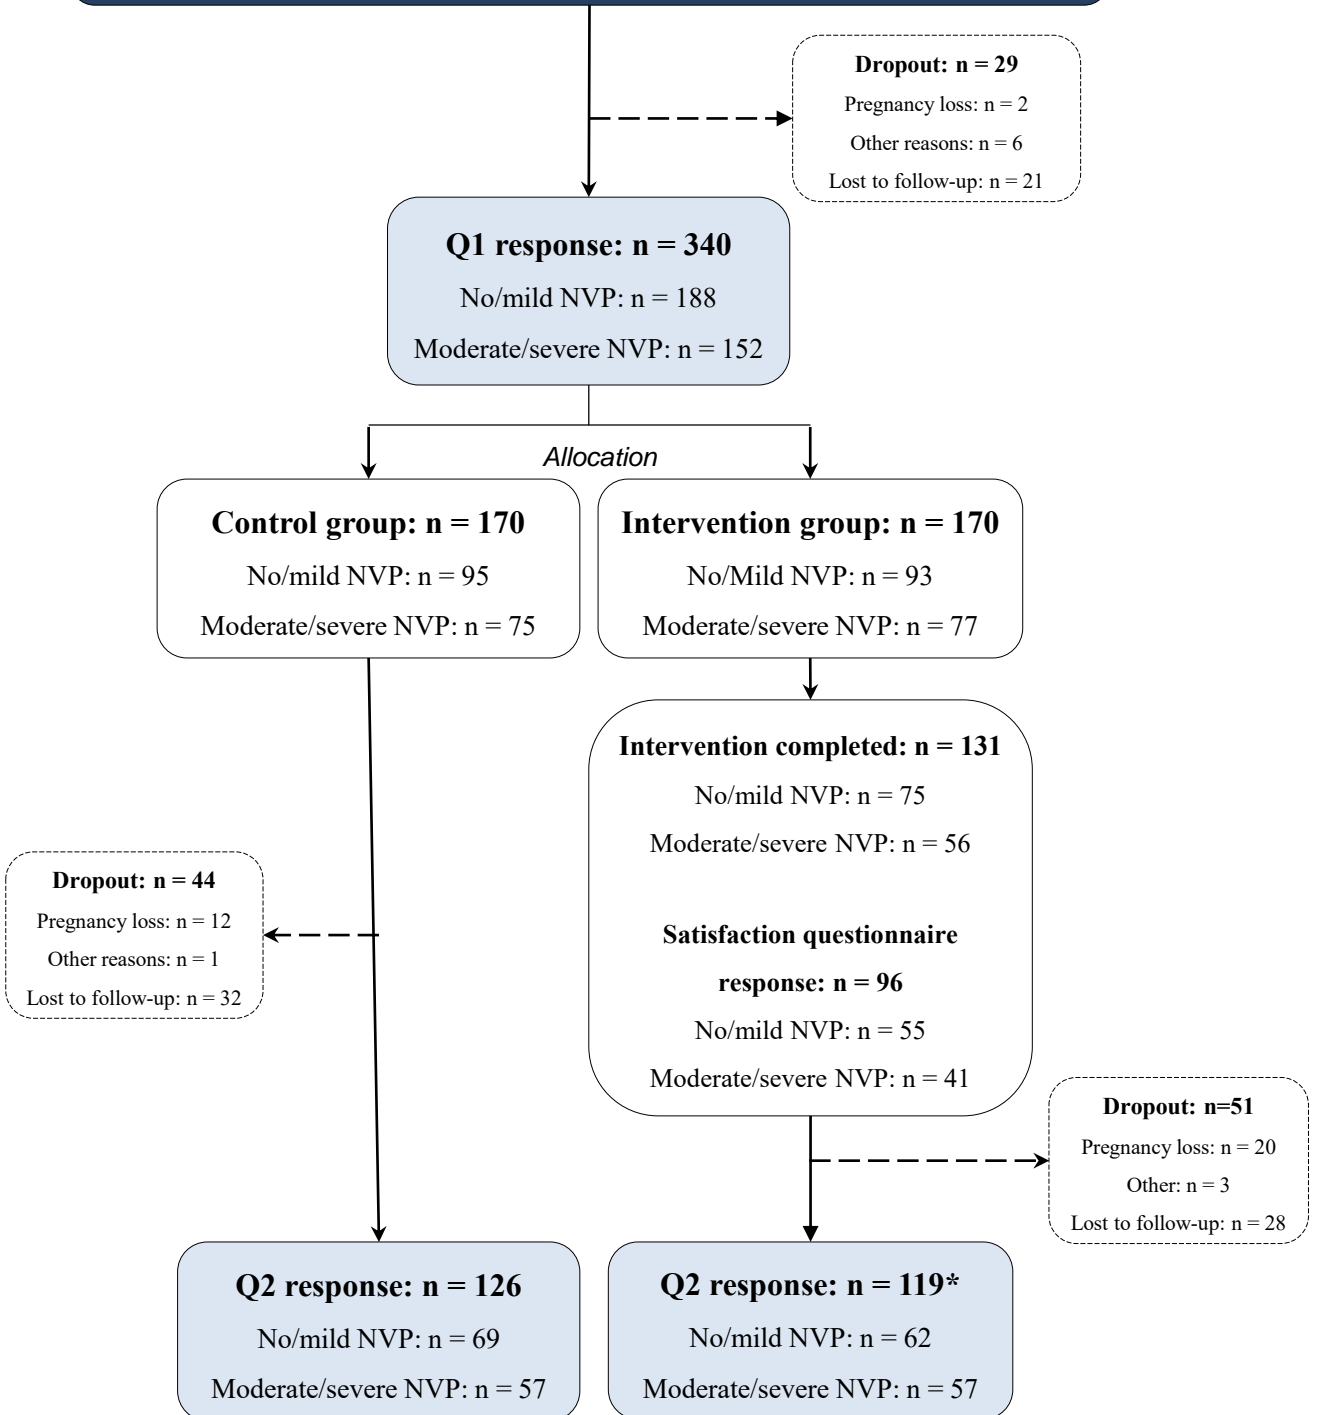

Supplement: MOESM3 [file 18670282]
